# Supplementary material for: Bonding character, electronic properties, and electronic transitions of perfluorocubane as a small electron acceptor
Source: Royal Society of Chemistry journal article supplement (doi:10.1039/d3cp01328f), 2023-01-01
Supplement: d3cp01328f1.pdf [file d3cp01328f1.pdf]

*Electronic Supplementary Information*

**Bonding character, electronic properties, and electronic transitions of  
perfluorocubane as small electron acceptor**

**Xiaojun Li,<sup>1,\*</sup> Shuna Li,<sup>1</sup> Jun Lu,<sup>2</sup> Hongjiang Ren,<sup>3</sup> Mengqi Zhang,<sup>1</sup> Wangdi Zhang<sup>1</sup>**

<sup>1</sup>*School of Science, Xi'an University of Posts and Telecommunications, Xi'an 710121,*

*Shaanxi, P. R. China;*

<sup>2</sup>*School of Life Science and Technology, Inner Mongolia University of Science and*

*Technology, Baotou 014010, P. R. China;*

<sup>3</sup>*School of Chemical Engineering, Xi'an University, Xi'an 710065, Shaanxi, P. R. China*

**Contents:**

- Comparison of the calculated C–C and C–F bond lengths, average binding energies and the adiabatic electron affinity of C<sub>8</sub>F<sub>8</sub>, obtained by using different functionals and MP2 method, Table S1.....S2

---

\*Corresponding author (email: xjli@xupt.edu.cn)

**Table 1.** Comparison of the calculated C–C ( $R_{C-C}$ , in Å) and C–F ( $R_{C-F}$ , in Å) bond lengths, average binding energies ( $E_b$ , in eV), and the adiabatic electron affinity (AEA) of the  $C_8F_8$  molecule, obtained by using different functionals and MP2 method.

| Methods    | Sym.             | $R_{C-C}$ | $R_{C-F}$ | $E_b$ | AEA  |
|------------|------------------|-----------|-----------|-------|------|
| B3LYP      | $O_h (^1A_{1g})$ | 1.577     | 1.338     | –4.29 | 1.78 |
| B3PW91     | $O_h (^1A_{1g})$ | 1.573     | 1.334     | –4.23 | 1.71 |
| M062X      | $O_h (^1A_{1g})$ | 1.569     | 1.330     | –4.30 | 1.50 |
| TPSSh      | $O_h (^1A_{1g})$ | 1.577     | 1.342     | –4.21 | 1.83 |
| MP2        | $O_h (^1A_{1g})$ | 1.574     | 1.351     | –4.23 | 1.62 |
| Experiment |                  | 1.570     | 1.341     |       |      |
